# Supplementary material for: AJM300, a novel oral antagonist of α4‐integrin, sustains an increase in circulating lymphocytes: A randomised controlled trial in healthy male subjects
Source: PubMed Central journal article supplement — Br J Clin Pharmacol. 2020 Jan 28;86(3):591–600. doi: 10.1111/bcp.14151 (PMC7080631; doi:10.1111/bcp.14151), 2020-01-28
Supplement: BCP-86-591-s001.pdf [file BCP-86-591-s001.pdf]

## Supporting information

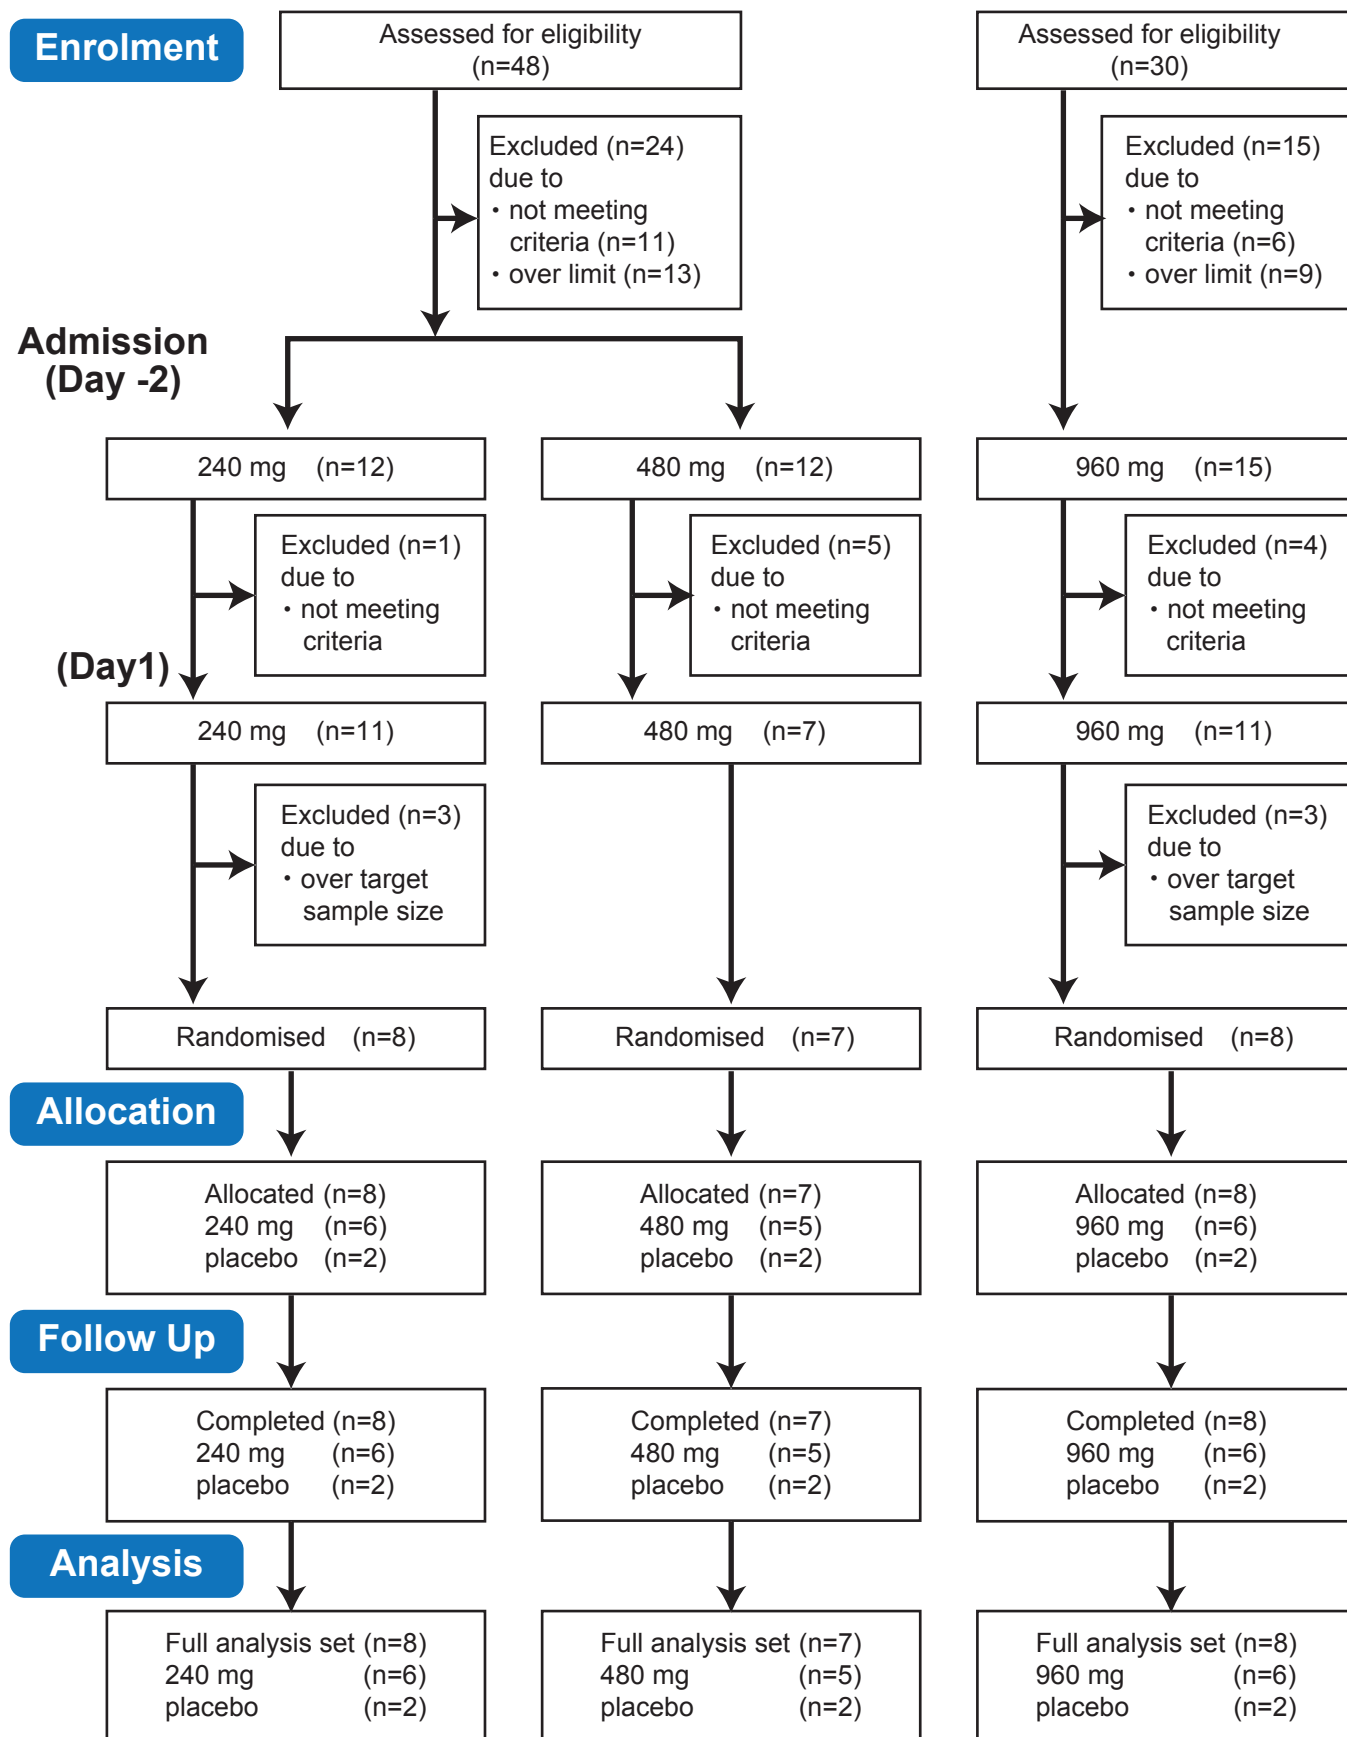

**Figure S1. CONSORT flow chart**

Each dose was given three times daily.

**Table S1. Subject demographics shown as mean (SD)**

| Mean AUEC (%·h)                | Placebo       | AJM300 dose   |               |               |
|--------------------------------|---------------|---------------|---------------|---------------|
|                                |               | 240 mg        | 480 mg        | 960 mg        |
| <b>Number of patients</b>      | 6             | 6             | 5             | 6             |
| <b>Age (years)</b>             | 23.7 (2.4)    | 24.2 (4.2)    | 24.6 (4.3)    | 24.8 (4.5)    |
| <b>Height (cm)</b>             | 171.12 (7.31) | 175.43 (9.09) | 172.78 (6.86) | 167.00 (3.65) |
| <b>Weight (kg)</b>             | 65.62 (5.41)  | 65.35 (8.70)  | 66.48 (3.97)  | 59.98 (7.26)  |
| <b>BMI (kg m<sup>-2</sup>)</b> | 22.47(1.91)   | 21.18 (1.87)  | 22.30 (1.39)  | 21.48 (2.22)  |

BMI, body mass index; SD, standard deviation.

**Table S2. PK dose proportionality assessed using a power model**

| PK parameters                                   | Slope | 95% CI         |             |
|-------------------------------------------------|-------|----------------|-------------|
|                                                 |       | lower bound    | upper bound |
| <b>Day 1</b>                                    |       | <b>AJM300</b>  |             |
| <b>C<sub>max 24h</sub> (ng mL<sup>-1</sup>)</b> | 0.930 | 0.343          | 1.517       |
| <b>AUC<sub>24h</sub> (ng·h mL<sup>-1</sup>)</b> | 1.026 | 0.679          | 1.373       |
| <b>Day 10</b>                                   |       |                |             |
| <b>C<sub>max 24h</sub> (ng mL<sup>-1</sup>)</b> | 0.611 | 0.275          | 0.946       |
| <b>AUC<sub>24h</sub> (ng·h mL<sup>-1</sup>)</b> | 0.680 | 0.453          | 0.907       |
| <b>Day 1</b>                                    |       | <b>HCA2969</b> |             |
| <b>C<sub>max 24h</sub> (ng mL<sup>-1</sup>)</b> | 1.000 | 0.576          | 1.425       |
| <b>AUC<sub>24h</sub> (ng·h mL<sup>-1</sup>)</b> | 0.986 | 0.667          | 1.305       |
| <b>Day 10</b>                                   |       |                |             |
| <b>C<sub>max 24h</sub> (ng mL<sup>-1</sup>)</b> | 0.678 | 0.408          | 0.949       |
| <b>AUC<sub>24h</sub> (ng·h mL<sup>-1</sup>)</b> | 0.678 | 0.413          | 0.942       |

**Table S3A. Mean AUEC where the increase in lymphocyte count was  $\geq 0\%$ ,  $\geq 30\%$  and  $50\%$**

| Mean AUEC (%·h) | Placebo | AJM300 dose |          |          |
|-----------------|---------|-------------|----------|----------|
|                 |         | 240 mg      | 480 mg   | 960 mg   |
| <b>Day 1</b>    |         |             |          |          |
| 0%              | 118.003 | 594.387     | 1000.177 | 1209.875 |
| 30%             | 3.379   | 113.170     | 389.327  | 546.608  |
| 50%             | 0.006   | 18.555      | 141.653  | 215.473  |
| <b>Day 10</b>   |         |             |          |          |
| 0%              | 109.139 | 698.558     | 1031.524 | 1197.023 |
| 30%             | 0.000   | 234.675     | 431.186  | 526.166  |
| 50%             | 0.000   | 98.512      | 169.276  | 202.027  |

**Table S3B. Strength of the relationship (p-value) to each contrast coefficient**

|               | Contrast coefficient |                  |                  |                  |                  |
|---------------|----------------------|------------------|------------------|------------------|------------------|
|               | -3, -1, 1, 3         | -3, -1, 1, 1     | -5, -1, 3, 3     | -1, -1, -1, 3    | -3, -3, 1, 5     |
| <b>Day 1</b>  |                      |                  |                  |                  |                  |
| 0%            | 98.2<br>(0.0000)     | 72.0<br>(0.0000) | 94.7<br>(0.0000) | 44.1<br>(0.0000) | 79.9<br>(0.0000) |
| 30%           | 98.0<br>(0.0000)     | 48.2<br>(0.0003) | 85.3<br>(0.0000) | 57.4<br>(0.0001) | 94.8<br>(0.0000) |
| 50%           | 94.1<br>(0.0003)     | 37.1<br>(0.0128) | 77.7<br>(0.0008) | 62.2<br>(0.0021) | 98.3<br>(0.0003) |
| <b>Day 10</b> |                      |                  |                  |                  |                  |
| 0%            | 94.3<br>(0.0000)     | 81.6<br>(0.0000) | 95.2<br>(0.0000) | 37.0<br>(0.0002) | 70.3<br>(0.0000) |
| 30%           | 97.8<br>(0.0001)     | 73.0<br>(0.0006) | 95.2<br>(0.0001) | 42.8<br>(0.0050) | 78.9<br>(0.0004) |
| 50%           | 96.4<br>(0.0086)     | 76.9<br>(0.0170) | 95.7<br>(0.0088) | 39.9<br>(0.0751) | 75.1<br>(0.0182) |

The strength of the relationship was obtained by eta-squared ( $\eta^2$ ), the sum of squares (contrast)/sum of squares (total). The polynomial contrast coefficient indicates following trends: linear, -3, -1, 1, 3; upper bound, -3, 1, 1, 1; half up, -5, -1, 3, 3; lower bound, -1, -1, -1, 3; half down, -3, -3, 1, 5. (refer to Figure 4)

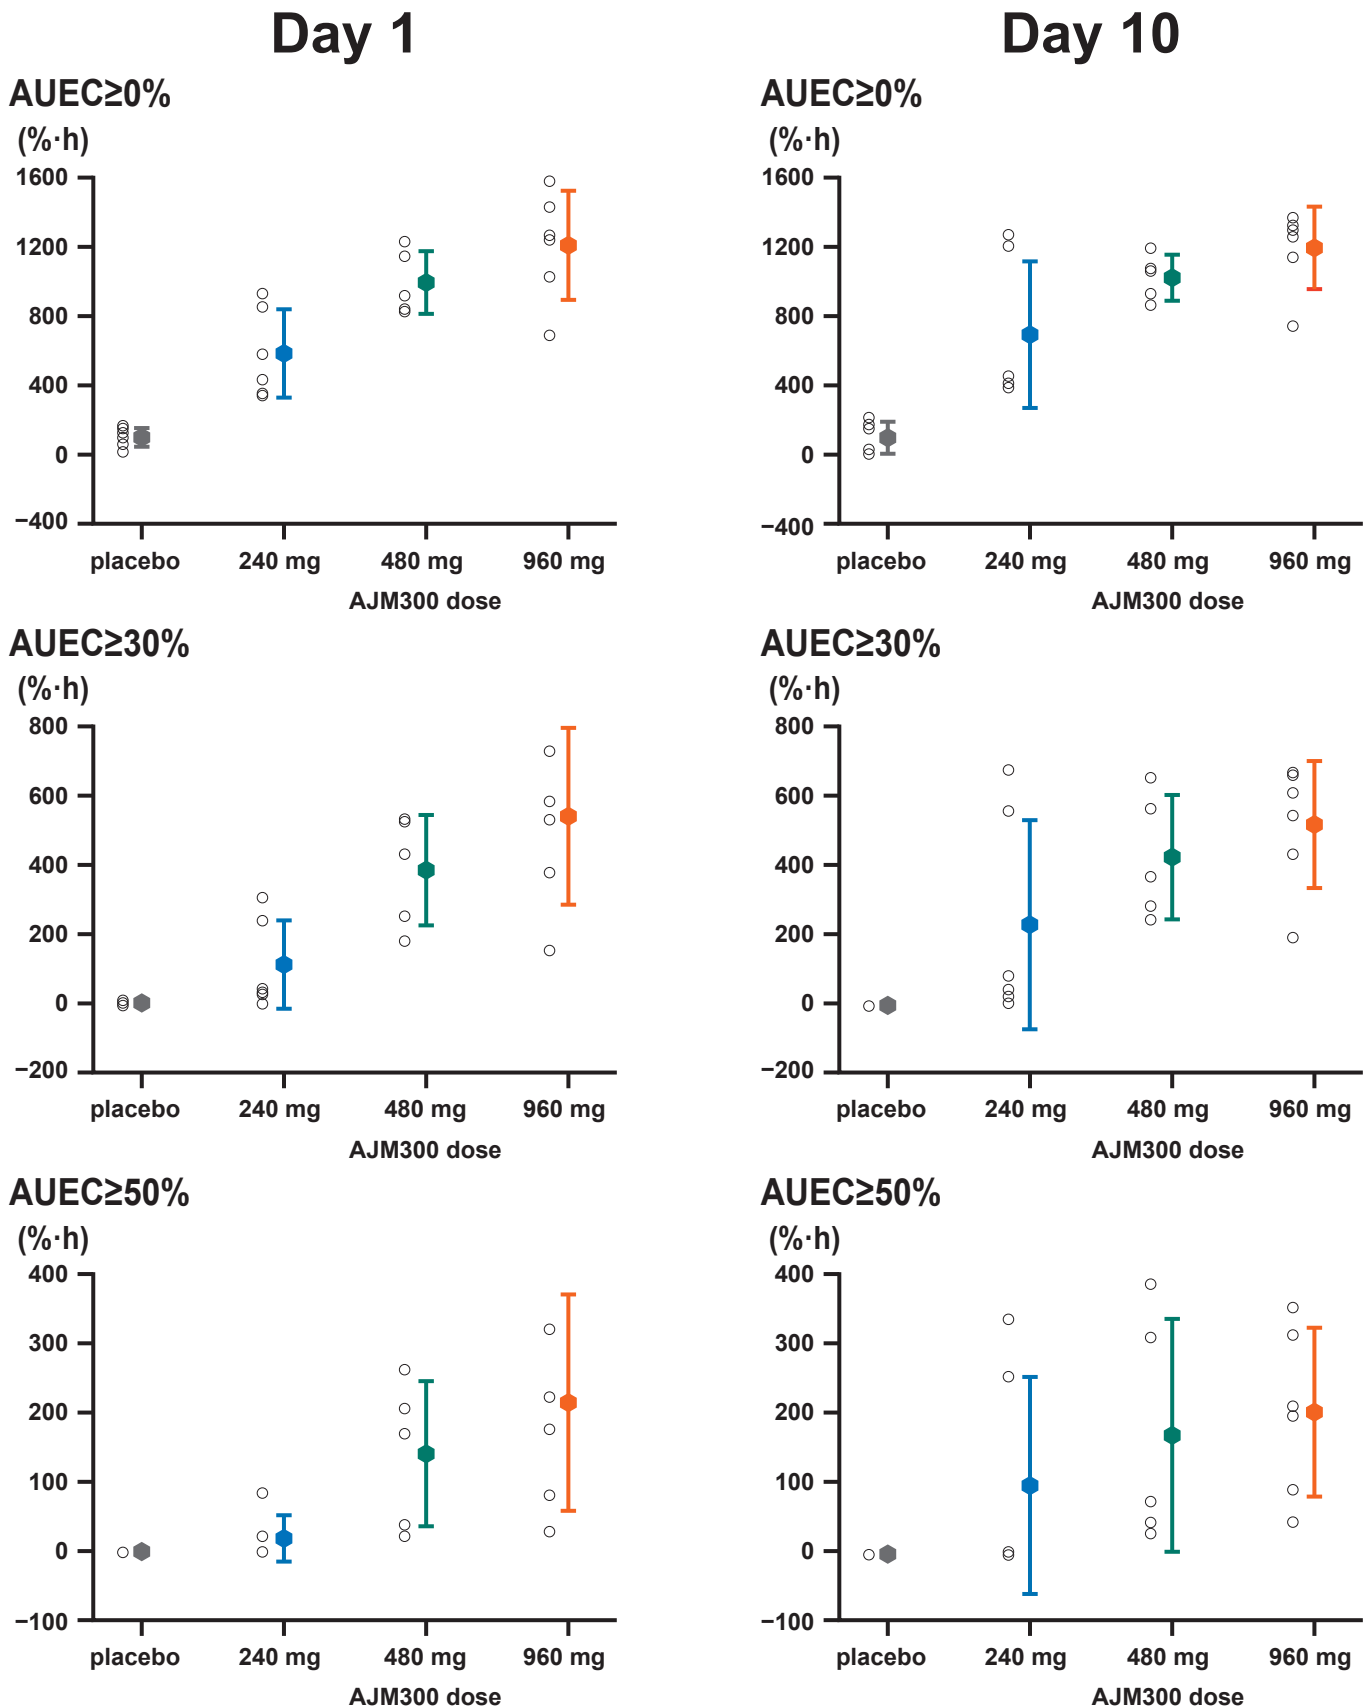

**Figure S2.** The mean AUECs where the increase in lymphocyte count from baseline were  $\geq 0\%$  (top),  $\geq 30\%$  (middle) and  $\geq 50\%$  (bottom) at each dosage tested.

The comparison between the AUECs where the percentage changes were  $\geq 0\%$  and  $\geq 30\%$  on Day 1, and  $\geq 30\%$  and  $\geq 50\%$  on Day 10 versus the dose demonstrated linear trends (refer to Table S3B). Data are presented as mean  $\pm$  SD.
